# Supplementary material for: A simple, single-tube overlapping amplicon-targeted Illumina sequencing assay
Source: PubMed Central journal article supplement (PMC10501585; doi:10.1371/journal.pone.0288687), 2023-09-14
Supplement: pone.0288687.s001.pdf [file pone.0288687.s001.pdf]

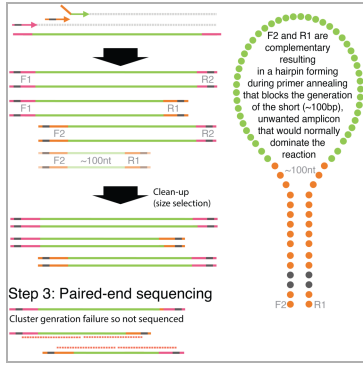

## CRS6V6HE

**Protocol Info:** Jason D Limberis, alina.levin, Joel Ernst, john.metcalfe . hissPCR: A simple, single-tube overlapping amplicon-targeted Illumina sequencing assay.. [protocols.io](https://protocols.io/view/hisspcr-a-simple-single-tube-overlapping-amplicon-crs6v6he) <https://protocols.io/view/hisspcr-a-simple-single-tube-overlapping-amplicon-crs6v6he>

**Created:** Mar 24, 2023

**Last Modified:** Apr 17, 2023

**PROTOCOL integer ID:** 79422

**hissPCR: A simple, single-tube overlapping amplicon-targeted Illumina sequencing assay. V.(crs6v6he)**

Jason D Limberis<sup>1</sup>, alina.levin<sup>1</sup>, Joel Ernst<sup>1</sup>, john.metcalfe<sup>1</sup>

<sup>1</sup>University of California, San Francisco

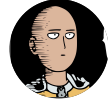

Jason D Limberis  
University of California, San Francisco

## ABSTRACT

Targeted amplicon sequencing to identify pathogens, resistance-conferring mutations, and strain types is an important tool in diagnosing and treating infections. However, due to the short read limitations of Illumina sequencing, many applications require the splitting of limited clinical samples between two reactions. Here, we outline hairpin Illumina single-tube sequencing PCR (*hissPCR*) which allows for the generation of overlapping amplicons containing Illumina indexes and adapters in a single tube, effectively extending the Illumina read length while maintaining reagent and sample input requirements.

## ATTACHMENTS

[hissPCR.png](#)

## MATERIALS

### Required

Q5 Hot Start High-Fidelity DNA Polymerase - 500 units **New England Biolabs Catalog #M0493L**

dNTPs **Contributed by users**

Agencourt AMPure XP **Beckman Coulter Catalog #A63880**

PowerUp SYBR Green Master Mix **Contributed by users Catalog #A25741**

A thermocycler and a qPCR machine

A magnetic rack

### Primers

| A                       | B         | C                                                                 |
|-------------------------|-----------|-------------------------------------------------------------------|
| Primer Set              | Direction | Sequence                                                          |
| Rv0678                  | F1        | ACACTCTTTCCCTACACGACGCTCTTCCGATCTtcatcgctgctggc                   |
| Rv0678                  | F2        | GACTGGAGTTCAGACGTGTGCTCTTCCGATCTgccgctcgggatcacacacc              |
| Rv0678                  | R1        | GACTGGAGTTCAGACGTGTGCTCTTCCGATCTttgactcggtggcggtgctg              |
| Rv0678                  | R2        | ACACTCTTTCCCTACACGACGCTCTTCCGATCTcgacgagcgctcgttggg               |
| Illumina adapter primer | F         | AATGATACGGCGACCACCGAGATCTACAC[i5]ACACTCTTCCCTACACGACGCTCTTCCGATCT |
| Illumina adapter primer | R         | GATCGGAAGAGCACACGTCTGAACTCCAGTCAC[i7]ATCTCGTATGCCGTCTTCTGCTTG     |
| Illumina_quant_Inner    | F         | ACACTCTTTCCCTACACGACGCTCTTCCGATCT                                 |
| Illumina_quant_Inner    | R         | GACTGGAGTTCAGACGTGTGCTCTTCCGATCT                                  |
| Illumina_quant_Outer    | F         | CAAGCAGAAGACGGCATACGAGAT                                          |
| Illumina_quant_Outer    | R         | AATGATACGGCGACCACCGAGATC                                          |

\*e.g., [i5] = A501 = TGAACCTT; [i7] = A701 = ATCACGAC

Lowercase bases are gene specific regions, change these if designing your own primer set

## Primer design

- 1 Primers must be designed as shown in the figure below, if any amplicon is larger than the 2 x sequencing length, the inner portion of the amplicon will not be covered. We have developed a

pipeline to assist in creating primers, which is available here: [hisPCR primer design](#), and is used as follows.

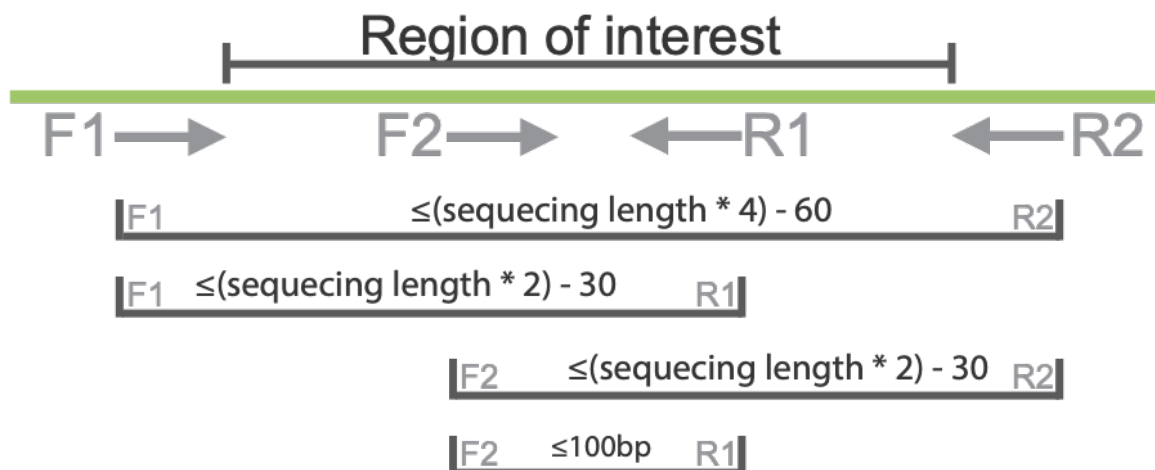

*hisPCR* Primer design strategy

```
hisPCR_primer_designer.sh \
  --name "rpob_demo" \
  --seq_cycles 300 \
  --start 100 \
  --end 800 \
  --template
"ttgaccgatgaccccggttcaggcttcaccacagtgtggaacgcggtcgtctccgaacttaacggc
gaccctaaggttgacgacggaccagcagtgatgctaattcagcgctccgctgaccctcagcaa
ggccttggtcaatctcgtccagccattgaccatcgtcgaggggttgctctgttatccgtgccgag
cagctttgtccaaaacgaaatcgagcgccatctgcgggccccgattaccgacgctctagccgccga
ctcgacatcagatccaactcggggtccgcatcgtccgcccggcgaccgacgaagccgacgacacta
ccgtgccgccttccgaaaatcctgctaccacatcgccagacaccacaaccgacaacgacgagattga
tgacagcgctgcggcacggggcgataaccagcacagttggccaagtacttcaccgagcgccgcac
aataccgattccgctaccgctggcgtaaccagccttaaccgctcgtacaccttgatacgttcgta
tcggcgcctccaaccggttcgcgcacgcccgccttggcgatcgagaagcaccgcccgcgctta
caacccctgttcatctggggcgagtccggtctcggcaagacacacctgctacacgcggcaggcaac
tatgcccaacggttggttccgggaatgcgggtcaaataatgtctcaccgaggaattaccaacgact
tcattaactcgtccgcatgaccgcaaggtcgcatcacaacgcagctaccgacgtagacgtgct
gttggtcgacgacatccaattcattgaaggcaaagagggtattcaagaggagttcttccacacctc
aacacctgcacaatgccaacaagcaaatcgtcatctcatctgaccgccaccgaagcagctcgcca
ccctcgaggaccggctgagaaccgctttgagtggggctgatcactgacgtacaaccaccgagct
ggagaccgcgcatcgccatcttgcgcaagaagcacagatggaacggctcgcggtccccgacgatgtc
ctcgaactcatcgccagcagtatcgaacgcaatatccgtgaactcgagggcgcgctgatccgggtca
ccgcttcgcctcattgaacaaaacaccaatcgacaaagcgctggccgagattgtgcttcgcatct
gatcgccgacgccaacaccatgcaaatcagcgcgggcgacgatcatggctgccaccgcccgaatactc
gacactaccgtcgaagagcttcgcgggccccggcaagaccgacgactggcccagtcacgacagattg
cgatgtacctgtgtcgtgagctcaccgatcttctggtgccaaaatcggccaagcgttcggccgtga
tcacacaaccgtcatgtacgccaacgcaagatcctgtccgagatggccgagcgccgtgaggtcttt
gatcacgtcaagaactcaccactcgcatccgtcagcgctccaagcgctag"
```

## Stage 1 PCR

2

| A                               | B                 |
|---------------------------------|-------------------|
| COMPONENT                       | Volume ( $\mu$ l) |
| 5X Q5 Reaction Buffer           | 10                |
| 5X Q5 High GC Buffer            | 10                |
| 10 mM dNTPs                     | 1                 |
| Q5 High-Fidelity DNA Polymerase | 0.5               |
| 10 $\mu$ M Forward primer 1     | 1                 |
| 10 $\mu$ M Reverse primer 2     | 1                 |
| 20 mg/ml BSA                    | 5                 |
| Template DNA (~1ng/u)           | 5                 |
| Nuclease-Free Water             | 18.5              |

The total volume is 50ul at this stage

| A            | B        | C        | D      |
|--------------|----------|----------|--------|
| Step         | Temp (C) | Time (s) | Cycles |
| Denaturation | 98       | 120      | 1      |
| Denaturation | 98       | 10       | 10     |
| Annealing    | 64       | 15       |        |
| Extension    | 72       | 45       |        |
| Extension    | 4        | Forever  | 1      |

Cycle parameters

As soon as the sample hits  4 °C, proceed to step 2.

## Stage 2 PCR

3

Add the below into the reaction while at  4 °C and proceed to the second PCR cycling

| A                                    | B           |
|--------------------------------------|-------------|
| COMPONENT                            | Volume (µl) |
| 10µM Forward primer 2                | 0.15        |
| 10µM Reverse primer 1                | 0.15        |
| 10µM Forward Illumina adapter primer | 0.35        |
| 10µM Reverse Illumina adapter primer | 0.35        |

The total volume is 51ul at this stage

| A            | B        | C        | D      |
|--------------|----------|----------|--------|
| Step         | Temp (C) | Time (s) | Cycles |
| Denaturation | 98       | 10       | 1      |
| Denaturation | 98       | 10       | 20     |
| Annealing    | 65       | 15       |        |
| Extension    | 72       | 30       |        |
| Extension    | 72       | 120      | 1      |

Cycle parameters

## Bead cleanup

4 Add  40 µL of resuspended AMPure XP beads to each reaction in a PCR tube

10m 30s

Mix by pipetting 10x

Incubate  00:05:00 at  Room temperature

Place on magnet

Wash 2x with  200 µL freshly-prepared  70 % (v/v) ethanol

Air dry for  00:00:30, don't allow the beads to become cracked

Remove the tubes from the magnetic rack

Add  50 µL 10 mM Tris-HCl pH 8.0 with 50 mM NaCl

NOTE: The BSA in the reaction causes the beads to clump.

Flick the tubes to partially resuspend the beads

Mix by pipetting 10x

Incubate  00:05:00 at  Room temperature

Place on the magnet, aspirate  50 µL of the eluant into a new tube

Run  10  $\mu\text{L}$  on a 0.8% agarose gel

**Optional: Determine the proportion of amplicons with both ..** 1m 50s

5 *Library quantification can be done using a commercial kit such as the [KAPA Library Quantification Kits](#) or using the below custom protocol.*

Dilute the cleaned up amplicons 1:100.

Make the master mix below using Illumina\_quant\_Inner primer set and a second master mix for Illumina\_quant\_Outer primer set.

| A                                  | B                        |
|------------------------------------|--------------------------|
| COMPONENT                          | Volume ( $\mu\text{l}$ ) |
| PowerUp SYBR Green Master Mix (2X) | 5                        |
| 10 $\mu\text{M}$ Forward primer    | 0.5                      |
| 10 $\mu\text{M}$ Reverse primer    | 0.5                      |
| Diluted amplicon                   | 2                        |
| Nuclease-Free Water                | 2                        |

qPCR master mix

Aliquot  8  $\mu\text{L}$  to each well and add in  2  $\mu\text{L}$  of the diluted amplicon.

6

| A              | B        | C        | D      | E               |
|----------------|----------|----------|--------|-----------------|
| Step           | Temp (C) | Time (s) | Cycles | Ramp Rate (C/s) |
| UDG activation | 50       | 120      | 1      | 2.73            |
| Denaturation   | 95       | 120      | 1      | 2.73            |
| Denaturation   | 95       | 1        |        | 2.73            |
| Amplification  | 60       | 30       |        | 2.11            |
| Capture        | 60       | 0        | –      |                 |
| Melt Curve     | 95       | 1        | 1      | 2.73            |
|                | 60       | 20       | 1      | 2.11            |
|                | 95       | –        | 1      | 0.15            |
|                | Capture  | –        | 1      | –               |

Cycle parameters for QuantStudio 3

- 7 The ratio of the Illumina \_quant\_Inner primer set to the Illumina \_quant\_Outer primer set will give the proportion of the DNA in the tube that contain both Illumina adapters and is sequencable (use this for pooling). While the melt curve will provide information on the proportion of each amplicon in the sample.

## Expected Result

8

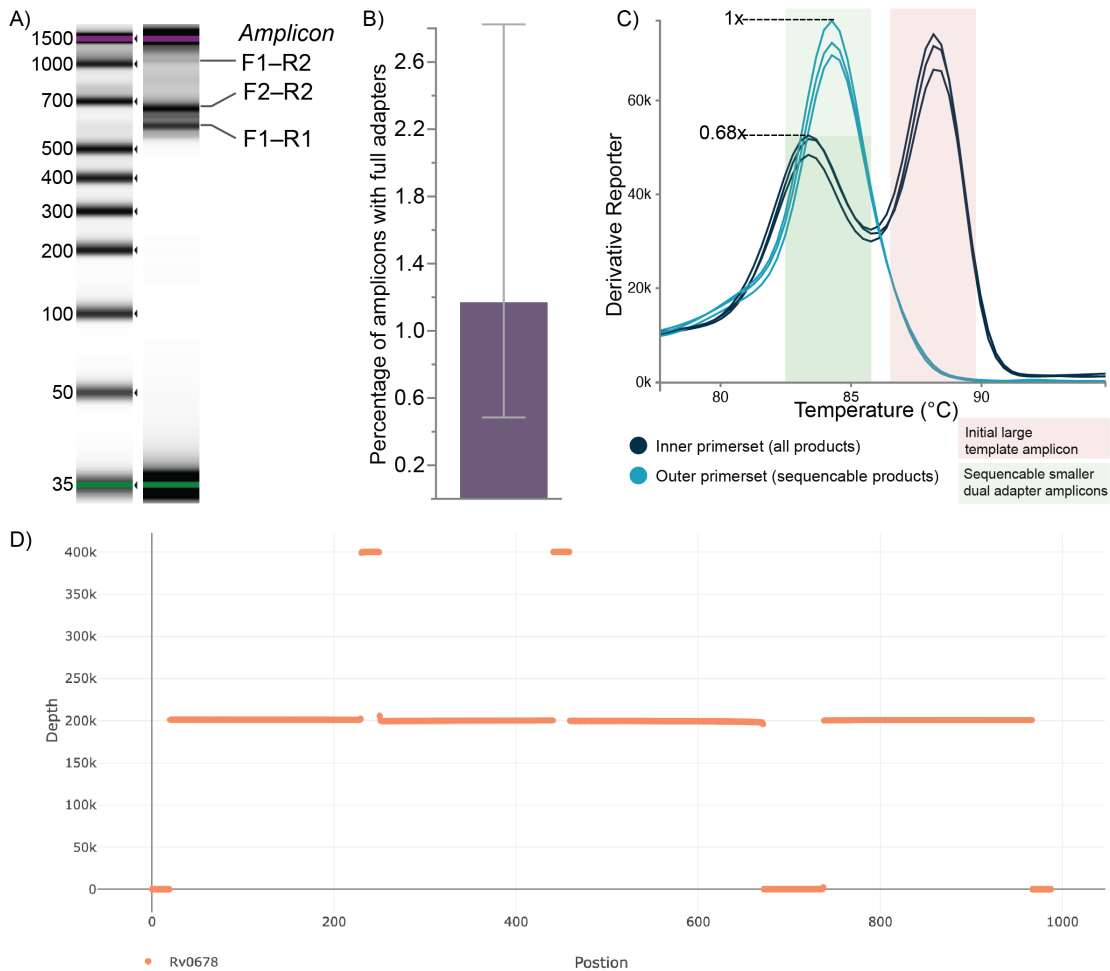

A) *his*PCR generated amplicons using two forward and two reverse overlapping primers in a single tube. Amplicons contain either no Illumina adapter, one Illumina adapter, or two Illumina adapters per amplicon. B) The relative proportion of amplicons in the sample containing both Illumina adapters. C) Melt curves showing the expected amplicons for each primer set and the ratio of amplicons containing both Illumina adapters. D) An output from the *his*PCR analysis pipeline showing the expected read coverage over the target area using 250bp Illumina sequencing. (see step 10 in protocol)

## Depth and Pooling Calculations

- 9 The amount of amplicon to be pooled and loaded can be calculated using the [Illumina Sequencing Coverage Calculator](#) by selecting DNA input then custom content and depends on numerous factors, including the amplicon size and number, and the kit and device used. An example output is shown below.

| A                                              | B                                                                                                                                   |
|------------------------------------------------|-------------------------------------------------------------------------------------------------------------------------------------|
| Application or product:                        | Custom Content                                                                                                                      |
| Genome or region size (Mbases)                 | 0.001                                                                                                                               |
| Read length                                    | 600                                                                                                                                 |
| On target (%)                                  | 95                                                                                                                                  |
| Coverage (x)                                   | 50000                                                                                                                               |
| Duplicates (%)                                 | 0                                                                                                                                   |
|                                                |                                                                                                                                     |
| Instrument                                     | MiSeq                                                                                                                               |
| Run type                                       | v3 Reagents                                                                                                                         |
| Clusters                                       | 25,000,000 per flow cell                                                                                                            |
| Output per unit (flow cell or lane)            | 15,000,000,000 per flow cell                                                                                                        |
| Exceeds maximum read length?                   | Does not exceed maximum (2x300)                                                                                                     |
| Number of units per sample (flow cell or lane) | 0.004 flow cells                                                                                                                    |
| Samples per unit (flow cell or lane)           | 285/flow cell Most Illumina library prep kits enable up to 96 indexes; Nextera XT up to 384 indexes.                                |
| Comments                                       | Upgraded software; MCS v2.3 or later; MiSeq Reagent Kit v3 (150/600)                                                                |
| Product                                        | MiSeq Reagent Kit v3                                                                                                                |
| Link                                           | <a href="http://www.illumina.com/products/miseq-reagent-kit-v3.html">http://www.illumina.com/products/miseq-reagent-kit-v3.html</a> |

Illumina coverage estimator output.

## Data Analysis

- 10 The sequence data can be performed using most amplicon processing pipelines; however, the primer sequences must be trimmed from the reads to eliminate their effect on mutation identification. We have developed a pipeline to process data which is available at [hissPCR analysis](#) with further details, below is its basic usage command.



```
bash hissPCR.sh \  
--R1 "test_data/read_R1_001.fastq.gz" \  
--R2 "test_data/read_R2_001.fastq.gz" \  
--ref "refs/BDQ_duplex.fasta" \  
--primers "refs/primers.bed" \  

```
