# Supplementary material for: A simple, single-tube overlapping amplicon-targeted Illumina sequencing assay
Source: PubMed Central journal article supplement (PMC10501585; doi:10.1371/journal.pone.0288687), 2023-09-14
Supplement: pone.0288687.s003.pdf [file pone.0288687.s003.pdf]

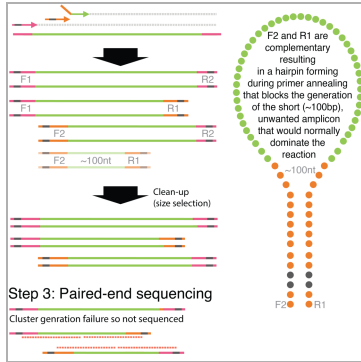

## hisPCR: A simple, single-tube overlapping amplicon-targeted Illumina sequencing assay

Jason D Limberis<sup>1</sup>, alina.levin<sup>1</sup>, Joel Ernst<sup>1</sup>, john.metcalfe<sup>1</sup>

<sup>1</sup>University of California, San Francisco

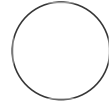

Jason D Limberis

University of California, San Francisco

### ABSTRACT

Targeted amplicon sequencing to identify pathogens, resistance-conferring mutations, and strain types is an important tool in diagnosing and treating infections. However, due to the short read limitations of Illumina sequencing, many applications require the splitting of limited clinical samples between two reactions. Here, we outline single-tube hairpin Illumina sequencing PCR (*hisPCR*) which allows for the generation of overlapping amplicons containing Illumina indexes and adapters in a single tube, effectively extending the Illumina read length while maintaining reagent and sample input requirements.

### ATTACHMENTS

[hisPCR.png](#)

**Protocol Info:** Jason D Limberis, alina.levin, Joel Ernst, john.metcalfe . hisPCR: A simple, single-tube overlapping amplicon-targeted Illumina sequencing assay.

**protocols.io**

<https://protocols.io/view/hispcr-a-simple-single-tube-overlapping-amplicon-t-cpgfvjtn>

**Created:** Feb 15, 2023

**Last Modified:** Feb 16, 2023

**PROTOCOL integer ID:**  
77031

## MATERIALS

### Required

Q5 Hot Start High-Fidelity DNA Polymerase - 500 units **New England Biolabs Catalog #M0493L**

dNTPs **Contributed by users**

Agencourt AMPure XP **Beckman Coulter Catalog #A63880**

PowerUp SYBR Green Master Mix **Contributed by users Catalog #A25741**

A thermocycler and a qPCR machine

A magnetic rack

### Primers

| A                       | B         | C                                                                 |
|-------------------------|-----------|-------------------------------------------------------------------|
| Primer Set              | Direction | Sequence                                                          |
| Rv0678                  | F1        | ACACTCTTTCCCTACACGACGCTCTTCCGATCTtcatcgctgctggc                   |
| Rv0678                  | F2        | GACTGGAGTTCAGACGTGTGCTCTTCCGATCTgccgctcgggatcacacacc              |
| Rv0678                  | R1        | GACTGGAGTTCAGACGTGTGCTCTTCCGATCTttgactcggtggcggtgctg              |
| Rv0678                  | R2        | ACACTCTTTCCCTACACGACGCTCTTCCGATCTcgacgagcgctcgttgg                |
| Illumina adapter primer | F         | AATGATACGGCGACCACCGAGATCTACAC[i5]ACACTCTTCCCTACACGACGCTCTTCCGATCT |
| Illumina adapter primer | R         | GATCGGAAGAGCACACGTCTGAACTCCAGTCAC[i7]ATCTCGTATGCCGTCTTCTGCTTG     |
| Illumina_quant_Inner    | F         | ACACTCTTTCCCTACACGACGCTCTTCCGATCT                                 |
| Illumina_quant_Inner    | R         | GACTGGAGTTCAGACGTGTGCTCTTCCGATCT                                  |
| Illumina_quant_Outer    | F         | CAAGCAGAAGACGGCATACGAGAT                                          |
| Illumina_quant_Outer    | R         | AATGATACGGCGACCACCGAGATC                                          |

\*e.g., [i5] = A501 = TGAACCTT; [i7] = A701 = ATCACGAC

Lowercase bases are gene specific regions, change these if designing your own primer set

## Stage 1 PCR

| A                               | B           |
|---------------------------------|-------------|
| COMPONENT                       | Volume (µl) |
| 5X Q5 Reaction Buffer           | 10          |
| 5X Q5 High GC Buffer            | 10          |
| 10 mM dNTPs                     | 1           |
| Q5 High-Fidelity DNA Polymerase | 0.5         |
| 10µM Forward primer 1           | 1           |
| 10µM Reverse primer 2           | 1           |
| 20 mg/ml BSA                    | 5           |
| Template DNA (~1ng/ul)          | 5           |
| Nuclease-Free Water             | 18.5        |

The total volume is 50ul at this stage

| A            | B        | C        | D      |
|--------------|----------|----------|--------|
| Step         | Temp (C) | Time (s) | Cycles |
| Denaturation | 98       | 120      | 1      |
| Denaturation | 98       | 10       | 10     |
| Annealing    | 64       | 15       |        |
| Extension    | 72       | 45       |        |
| Extension    | 4        | Forever  | 1      |

Cycle parameters

As soon as the sample hits  4 °C, proceed to step 2.

## Stage 2 PCR

2 Add the below into the reaction while at  4 °C and proceed to the second PCR cycling

| A                     | B           |
|-----------------------|-------------|
| COMPONENT             | Volume (µl) |
| 10µM Forward primer 2 | 0.15        |
| 10µM Reverse primer 1 | 0.15        |

| A                                    | B    |
|--------------------------------------|------|
| 10µM Forward Illumina adapter primer | 0.35 |
| 10µM Reverse Illumina adapter primer | 0.35 |

The total volume is 51ul at this stage

| A            | B        | C        | D      |
|--------------|----------|----------|--------|
| Step         | Temp (C) | Time (s) | Cycles |
| Denaturation | 98       | 10       | 1      |
| Denaturation | 98       | 10       | 20     |
| Annealing    | 65       | 15       |        |
| Extension    | 72       | 30       |        |
| Extension    | 72       | 120      | 1      |

Cycle parameters

## Bead cleanup

3 Add  40 µL of resuspended AMPure XP beads to each reaction in a PCR tube

10m 30s

Mix by pipetting 10x

Incubate  00:05:00 at  Room temperature

Place on magnet

Wash 2x with  200 µL freshly-prepared  70 % (v/v) ethanol

Air dry for  00:00:30, don't allow the beads to become cracked

Remove the tubes from the magnetic rack

Add  50 µL 10 mM Tris-HCl pH 8.0 with 50 mM NaCl

NOTE: The BSA in the reaction causes the beads to clump.

Flick the tubes to partially resuspend the beads

Mix by pipetting 10x

Incubate  00:05:00 at  Room temperature

Place on the magnet, aspirate  50 µL of the eluant into a new tube

Run  10 µL on a 0.8% agarose gel

Optional: Determine the proportion of amplicons with both ...

1m 50s

- 4 Dilute the cleaned up amplicons 1:100.  
Make the master mix below using Illumina\_quant\_Inner primer set and a second master mix for Illumina\_quant\_Outer primer set.

| A                                  | B           |
|------------------------------------|-------------|
| COMPONENT                          | Volume (μl) |
| PowerUp SYBR Green Master Mix (2X) | 5           |
| 10μM Forward primer                | 0.5         |
| 10μM Reverse primer                | 0.5         |
| Diluted amplicon                   | 2           |
| Nuclease-Free Water                | 2           |

qPCR master mix

Aliquot  8 μL to each well and add in  2 μL of the diluted amplicon.

5

| A              | B        | C        | D      | E               |
|----------------|----------|----------|--------|-----------------|
| Step           | Temp (C) | Time (s) | Cycles | Ramp Rate (C/s) |
| UDG activation | 50       | 120      | 1      | 2.73            |
| Denaturation   | 95       | 120      | 1      | 2.73            |
| Denaturation   | 95       | 1        |        | 2.73            |
| Amplification  | 60       | 30       |        | 2.11            |
| Capture        | 60       | 0        | –      |                 |
| Melt Curve     | 95       | 1        | 1      | 2.73            |
|                | 60       | 20       | 1      | 2.11            |
|                | 95       | –        | 1      | 0.15            |
|                | Capture  | –        | 1      | –               |

Cycle parameters for QuantStudio 3

- 6 The ratio of the Illumina\_quant\_Inner primer set to the Illumina\_quant\_Outer primer set will give the proportion of the DNA in the tube that contain both Illumina adapters and is sequencable (use this for pooling). While the melt curve will provide information on the proportion of each amplicon in the sample.

## Expected Result

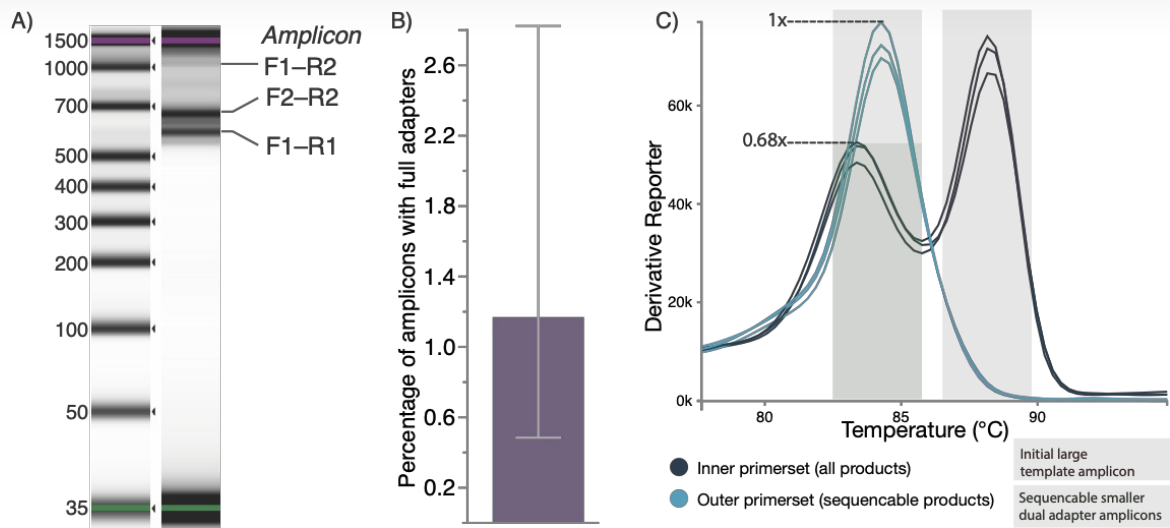

*A) hisPCR generated amplicons using two forward and two reverse overlapping primers in a single tube. Amplicons contain either no Illumina adapter, one Illumina adapter, or two Illumina adapters per amplicon. B) The relative proportion of amplicons in the sample containing both Illumina adapters. C) Melt curves showing the expected amplicons for each of the primer sets, and the ratio of amplicons containing both Illumina adapters.*
