# Supplementary material for: A simple, single-tube overlapping amplicon-targeted Illumina sequencing assay
Source: PubMed Central journal article supplement (PMC10501585; doi:10.1371/journal.pone.0288687), 2023-09-14
Supplement: pone.0288687.s004.pdf [file pone.0288687.s004.pdf]

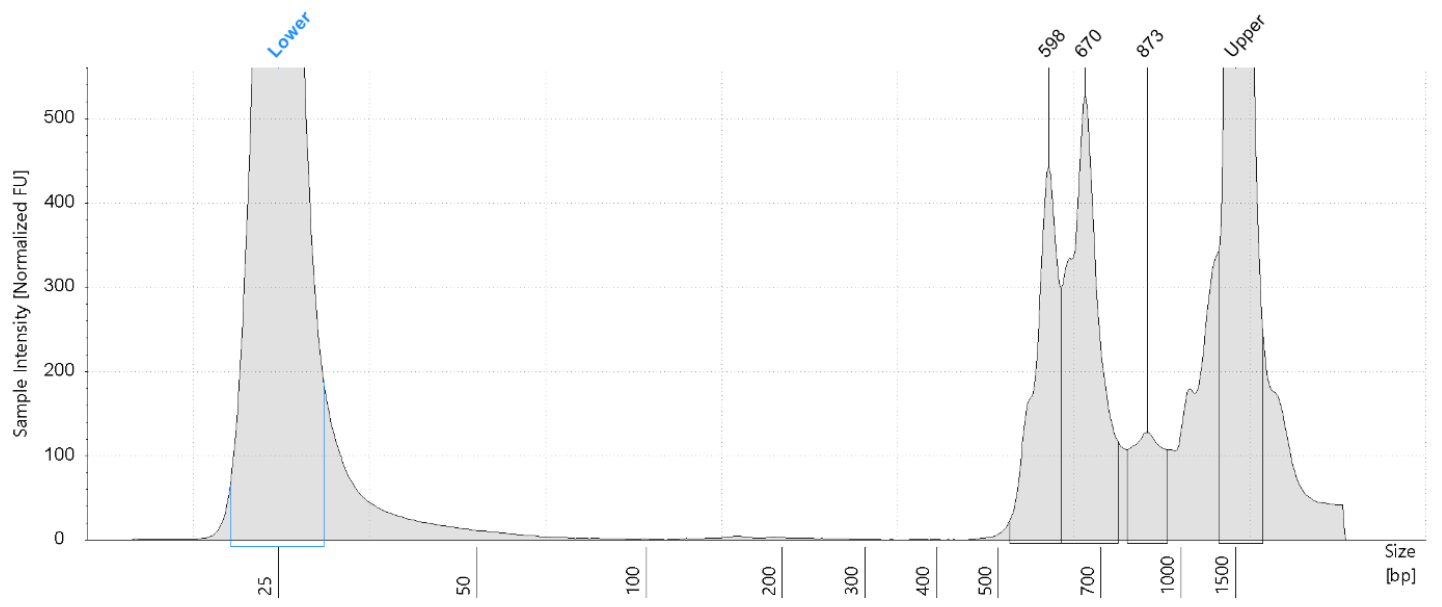

**S1\_raw\_images.** Electropherogram output from D1000 Agilent TapeStation of *hiss*PCR generated amplicons using two forward and two reverse overlapping primers in a single tube as shown in Figure 1 A.
